# Supplementary material for: Association between anthropometry and lifestyle factors and risk of B‐cell lymphoma: An exposome‐wide analysis
Source: PubMed Central journal article supplement (PMC8048490; doi:10.1002/ijc.33369), 2020-11-12
Supplement: IJC-148-2115-s001.pdf [file IJC-148-2115-s001.pdf]

## **Association between anthropometry and lifestyle factors and risk of B cell lymphoma: an exposome wide analysis**

Fatemeh Saberi Hosnijeh, Delphine Casabonne, Alexandra Nieters, Marta Solans, Sabine Naudin, Pietro Ferrari, James D. McKay, Yolanda Benavente, Elisabete Weiderpass, Heinz Freisling, Gianluca Severi, Marie-Christine Boutron Ruault, Caroline Besson, Claudia Agnoli, Giovanna Masala, Carlotta Sacerdote, Rosario Tumino, José María Huerta, Pilar Amiano, Miguel Rodriguez-Barranco, Catalina Bonet, Aurelio Barricarte, Sofia Christakoudi, Anika Knuppel, Bas Bueno-de-Mesquita, Matthias B. Schulze, Rudolf Kaaks, Federico Canzian, Florentin Späth, Mats Jerkeman, Charlotta Rylander, Anne Tjønneland, Anja Olsen, Kristin Benjaminsen Borch, Roel Vermeulen

### **Table of contents**

**Supplementary Table 1.** ICD-O-3 morphology codes

**Supplementary Table 2.** List of included exposures; mean and median for continuous exposures and frequency (%) of categorical exposures in total study population

**Supplementary Table 3.** Missing rate

**Supplementary Table 4.** Case number of BCL and major subtypes stratified by country

**Supplementary Table 5.** Univariate Cox model for individual exposure in total BCL and subtypes

**Supplementary Table 6.** Estimates and SE of the significant associated exposures from meta-analysis of per-country Cox model coefficients adjusted for age and gender (upper part) and estimates and SE of the significant associated exposures of Cox model adjusted for country, age, and sex (lower part)

**Supplementary Table 7 (Excel file).** Standard Cox regression for individual exposure adjusted for country stratified by age and sex in total BCL and subtypes

**Supplementary Table 8 (Excel file).** Component loading across the components and the total variance explained by each component from PCA analysis

**Supplementary Table 9.** HRs and 95%CI of the significant principal components for total BCL and major subtypes adjusted for age, gender, and country

**Supplementary Table 10.** Multivariate Cox regression of the principal components for total BCL and major subtypes mutually adjusted for other PCs stratified by age

**Supplementary Figure 1.** Heatmap of age-, sex- and country- adjusted Spearman correlation between each two variables

**Supplementary Figure 2.** Circos plot showing Spearman correlation of exposures adjusted for age, sex, and country in the data

**Supplementary Figure 3.** Cox regression for individual exposure adjusted for age and sex in total BCL and subtypes obtained from meta-analysis of the country-based estimates

**Supplementary Table 1. ICD-O-3 morphology codes**

| <b>Code</b> | <b>BCL Subtype</b>                                             | <b>Case Number</b> |
|-------------|----------------------------------------------------------------|--------------------|
| 9670/3      | B cell chronic lymphocytic leukemia/small lymphocytic leukemia | 69                 |
| 9823/3      | B cell chronic lymphocytic leukemia/small lymphocytic leukemia | 468                |
| 9679/3      | Diffuse large B-cell lymphoma                                  | 1                  |
| 9680/3      | Diffuse large B-cell lymphoma                                  | 480                |
| 9684/3      | Diffuse large B-cell lymphoma                                  | 7                  |
| 9690/3      | Follicular lymphoma                                            | 302                |
| 9691/3      | Follicular lymphoma                                            | 29                 |
| 9695/3      | Follicular lymphoma                                            | 24                 |
| 9698/3      | Follicular lymphoma                                            | 26                 |
| 9731/3      | Plasma cell neoplasm/Multiple myeloma                          | 49                 |
| 9732/3      | Plasma cell neoplasm/Multiple myeloma                          | 615                |
| 9733/3      | Plasma cell neoplasm/Multiple myeloma                          | 5                  |
| 9734/3      | Plasma cell neoplasm/Multiple myeloma                          | 7                  |
| 9761/3      | Lymphoplasmacytic Lymphoma                                     | 39                 |
| 9671/3      | Lymphoplasmacytic Lymphoma                                     | 62                 |
| 9826/3      | Burkitt cell leukemia                                          | 1                  |
| 9687/3      | Burkitt lymphoma                                               | 11                 |
| 9832/3      | Prolymphocytic leukemia, B- cell                               | 4                  |
| 9940/3      | Hairy cell leukemia                                            | 31                 |
| 9689/3      | Marginal zone lymphoma                                         | 10                 |
| 9699/3      | Marginal zone lymphoma                                         | 90                 |
| 9673/3      | Mantle cell lymphoma                                           | 71                 |
| 9678/3      | Primary effusion lymphoma                                      | 1                  |
| Total       |                                                                | 2402               |

**Supplementary Table 2.** List of included exposures; mean and median for continuous exposures and frequency (%) of categorical exposures in total study population

| Category                                   | Exposure                                              | Remark     | Mean  | Median | %                    |
|--------------------------------------------|-------------------------------------------------------|------------|-------|--------|----------------------|
| Anthropometry                              | Body-mass index, (kg/m <sup>2</sup> )                 | Continuous | 25.4  | 24.8   |                      |
|                                            | Height (cm)                                           | Continuous | 166   | 165    |                      |
|                                            | Weight (kg)                                           | Continuous | 70.2  | 68.4   |                      |
|                                            | Hip circumference (cm)                                | Continuous | 100.6 | 100    |                      |
|                                            | Waist circumference (cm)                              | Continuous | 84.3  | 83.7   |                      |
|                                            | Waist to hip ratio                                    | Continuous | 0.84  | 0.83   |                      |
| Smoking                                    | Currently smoke cigarettes                            | Yes/no     |       |        | 22.2                 |
|                                            | Currently smoke cigars                                | Yes/no     |       |        | 1.6                  |
|                                            | Ever smoker                                           | Yes/no     |       |        | 51                   |
|                                            | Current smoker                                        | Yes/no     |       |        | 23.6                 |
|                                            | Duration of smoking (year)                            | Continuous | 11.7  | 0      |                      |
|                                            | Duration of cigarettes smoking (year)                 | Continuous | 11.1  | 0      |                      |
|                                            | Currently smoking >15/day                             | Yes/no     |       |        | 8.2                  |
|                                            | Currently smoking >25/day                             | Yes/no     |       |        | 1.9                  |
| Alcohol                                    | Alcohol at recruitment (g/day)                        | Continuous | 11.6  | 5.3    |                      |
| SEP                                        | Education *                                           | 1-4        |       |        | 30.3, 23.8, 21, 24.9 |
| Medical history                            | Myocardial infarction (MI)                            | Yes/no     |       |        | 1.4                  |
|                                            | Stroke                                                | Yes/no     |       |        | 2.6                  |
|                                            | Hypertension                                          | Yes/no     |       |        | 24.9                 |
|                                            | Diabetes                                              | Yes/no     |       |        | 2.8                  |
|                                            | Cardiovascular problem reported                       | Yes/no     |       |        | 26.5                 |
| Physical activity                          | METS recreational activity                            | Continuous | 31.4  | 27.0   |                      |
|                                            | METS household activity                               | Continuous | 51.5  | 44.7   |                      |
|                                            | METS recreational and household activity              | Continuous | 82.9  | 78.0   |                      |
|                                            | Sedentary occupation                                  | Yes/no     |       |        | 28.1                 |
|                                            | Standing occupation                                   | Yes/no     |       |        | 24.8                 |
|                                            | Manual work                                           | Yes/no     |       |        | 9.7                  |
|                                            | Heavy manual work                                     | Yes/no     |       |        | 2.7                  |
|                                            | Total physical activity index (sex-specific) (Active) | Yes/no     |       |        | 10.7                 |
|                                            | IARC physical activity score †                        | 1-3        |       |        | 33.2, 33.4, 33.3     |
|                                            | IARC physical activity score (Intense)                | Yes/no     |       |        | 33.3                 |
|                                            | Cambridge physical activity index ‡                   | 1-4        |       |        | 21, 33.8, 27, 18.2   |
| Cambridge physical activity index (Active) | Yes/no                                                |            |       | 18.2   |                      |
| Food group                                 | Potatoes and other tubers (g/day)                     | Continuous | 92.3  | 75.7   |                      |
|                                            | Vegetables (g/day)                                    | Continuous | 211.5 | 175.4  |                      |
|                                            | Legumes (g/day)                                       | Continuous | 14.6  | 5.7    |                      |
|                                            | Fruits, nuts and seeds (g/day)                        | Continuous | 239.8 | 200.5  |                      |
|                                            | Dairy products (g/day)                                | Continuous | 326.6 | 277.2  |                      |
|                                            | Cereal and cereal products (g/day)                    | Continuous | 219.1 | 200.1  |                      |
|                                            | Meat and meat products (g/day)                        | Continuous | 98.6  | 91.8   |                      |
|                                            | Fish and shellfish (g/day)                            | Continuous | 37.1  | 28.0   |                      |
|                                            | Egg and egg products (g/day)                          | Continuous | 17.7  | 14.0   |                      |
|                                            | Fat (g/day)                                           | Continuous | 28.2  | 25.3   |                      |
|                                            | Sugar and confectionary (g/day)                       | Continuous | 41.7  | 30.7   |                      |

|                 |                                             |            |        |        |
|-----------------|---------------------------------------------|------------|--------|--------|
|                 | Cakes and biscuits (g/day)                  | Continuous | 40.8   | 29.4   |
|                 | Non-alcoholic beverages (g/day)             | Continuous | 1060.3 | 994.8  |
|                 | Alcoholic beverages (g/day)                 | Continuous | 170.8  | 71.5   |
|                 | Condiments and sauces (g/day)               | Continuous | 21.1   | 15.8   |
|                 | Soups, bouillons (g/day)                    | Continuous | 49.3   | 22.1   |
| ENDB            | Total proteins (g/day)                      | Continuous | 86.7   | 83.6   |
|                 | Carbohydrates (g/day)                       | Continuous | 228.1  | 218.3  |
|                 | Total fats (g/day)                          | Continuous | 81.4   | 77.3   |
|                 | Alcohol (g/day)                             | Continuous | 12.0   | 5.7    |
|                 | Cholesterol (mg/day)                        | Continuous | 315.1  | 291.7  |
|                 | Total saturated fatty acids (g/day)         | Continuous | 31.2   | 29.2   |
|                 | Total monounsaturated fatty acids (g/day)   | Continuous | 30.0   | 27.4   |
|                 | Total polyunsaturated fatty acids (g/day)   | Continuous | 13.4   | 12.2   |
|                 | Total dietary fibre (g/day)                 | Continuous | 22.8   | 21.8   |
|                 | Vitamin C (mg/day)                          | Continuous | 127.3  | 113.5  |
|                 | Beta-carotene (µg/day)                      | Continuous | 3577.7 | 2865.6 |
|                 | Vitamin E (mg/day)                          | Continuous | 12.2   | 10.9   |
|                 | Potassium (mg/day)                          | Continuous | 3678   | 3570   |
|                 | Water (g/day)                               | Continuous | 2219.2 | 2117.7 |
|                 | Starch (g/day)                              | Continuous | 120.9  | 113.3  |
|                 | Calcium (mg/day)                            | Continuous | 994.6  | 935.4  |
|                 | Phosphorus (mg/day)                         | Continuous | 1516.1 | 1454.6 |
|                 | Iron (mg/day)                               | Continuous | 13.1   | 12.5   |
|                 | Sugar (g/day)                               | Continuous | 102.9  | 96.0   |
|                 | Magnesium (mg/day)                          | Continuous | 359.9  | 345.3  |
|                 | Retinol (µg/day)                            | Continuous | 830.3  | 621.3  |
|                 | Riboflavin, B2 (mg/day)                     | Continuous | 1.86   | 1.73   |
|                 | Thiamin, B1 (mg/day)                        | Continuous | 1.34   | 1.25   |
|                 | Cobalamin, B12 (µg/day)                     | Continuous | 6.5    | 5.7    |
|                 | Vitamin B6 (mg/day)                         | Continuous | 1.88   | 1.79   |
|                 | Vitamin D (µg/day)                          | Continuous | 4.16   | 3.31   |
|                 | Total proteins, animal origin (g/day)       | Continuous | 52.0   | 49.9   |
|                 | Total proteins, plant origin (g/day)        | Continuous | 27.1   | 25.4   |
|                 | Total fats, animal origin (g/day)           | Continuous | 36.5   | 33.7   |
|                 | Total fats, plant origin (g/day)            | Continuous | 25.9   | 21.1   |
|                 | Folate (µg/day)                             | Continuous | 30.8.5 | 288.7  |
|                 | Energy (kcal/day)                           | Continuous | 2075   | 1996.9 |
| Dietary pattern | Mediterranean diet score §                  | Continuous | 7.8    | 8      |
|                 | Inflammatory score of the diet              | Continuous | 0.257  | 0.342  |
|                 | Inflammatory score of the diet-no alcohol § | Continuous | 0.235  | 0.322  |

Socioeconomic position (SEP); \* None/ Primary school, Technical/professional school, Secondary school, Longer education (incl. university degree); Nutrient density from EPIC Nutrient Data Base (ENDB), Metabolic Equivalent of Task/ week (METS); † Low, Medium, High; ‡ Inactive, moderately inactive, moderately active, active; § excluding alcohol

**Supplementary Table 3. Missing rate**

| <b>Variables</b>                         | <b>Missing rate %</b> |
|------------------------------------------|-----------------------|
| Hip circumference                        | 22.2                  |
| Waist circumference                      | 22.2                  |
| Education                                | 3.6                   |
| Myocardial infarction                    | 3.2                   |
| Stroke                                   | 8.8                   |
| Hypertension                             | 10.9                  |
| Diabetes                                 | 3.5                   |
| Cardiovascular problem reported          | 15.4                  |
| METS recreational activity               | 13.7                  |
| METS household activity                  | 13.7                  |
| METS recreational and household activity | 13.7                  |
| PA-Work                                  | 10.1                  |
| Total physical activity index            | 6.9                   |
| IARC physical activity score             | 1.4                   |
| Cambridge physical activity index        | 1.9                   |
| Currently smoke cigarette                | 1.5                   |
| Currently smoke cigars                   | 1.4                   |
| Smoking status                           | 2.0                   |
| Duration of smoking                      | 4.3                   |
| Duration of cigarette smoking            | 2.5                   |
| Smoke Intensity                          | 1.7                   |

\*PA: physical activity; Metabolic Equivalent of Task/ week (METS)

**Supplementary Table 4. Case number of BCL and major subtypes stratified by country**

| <b>Country</b> | <b>BCL, n=2402</b> | <b>DLBCL, n=488</b> | <b>CLL, n=537</b> | <b>FL, n=381</b> | <b>MM, n=676</b> |
|----------------|--------------------|---------------------|-------------------|------------------|------------------|
| France         | 205 (8.5%)         | 40 (8.2%)           | 44 (8.2%)         | 44 (11.5%)       | 45 (6.7%)        |
| Italy          | 218 (9.1%)         | 38 (7.8%)           | 44 (8.2%)         | 33 (8.7%)        | 73 (10.8%)       |
| Spain          | 194 (8.1%)         | 35 (7.2%)           | 51 (9.5%)         | 27 (7.1%)        | 51 (7.5%)        |
| UK             | 426 (17.7%)        | 95 (19.5%)          | 87 (16.2%)        | 71 (18.6%)       | 115 (17.0%)      |
| Netherlands    | 172 (7.2%)         | 43 (8.8%)           | 41 (7.6%)         | 26 (6.8%)        | 43 (6.4%)        |
| Greece         | 38 (1.6%)          | 3 (0.6%)            | 13 (2.4%)         | 3 (0.8%)         | 15 (2.2%)        |
| Germany        | 170 (7.1%)         | 30 (6.1%)           | 39 (7.3%)         | 20 (5.2%)        | 55 (8.1%)        |
| Sweden         | 344 (14.3%)        | 57 (11.7%)          | 74 (13.8%)        | 48 (12.6%)       | 132 (19.5%)      |
| Denmark        | 506 (21.1%)        | 121 (24.8%)         | 118 (22.0%)       | 78 (20.5%)       | 123 (18.2%)      |
| Norway         | 129 (5.4%)         | 26 (5.3%)           | 26 (4.8%)         | 31 (8.1%)        | 24 (3.6%)        |

**Supplementary Table 5.** Univariate Cox model for individual exposure in total BCL and subtypes (black: significant after FDR multiple testing correction)

| Exposure                | BCL      |         |         | CLL      |         |         | FL       |         |         | DLBCL    |         |         | MM       |         |         |
|-------------------------|----------|---------|---------|----------|---------|---------|----------|---------|---------|----------|---------|---------|----------|---------|---------|
|                         | Estimate | SE      | pFDR    | Estimate | SE      | pFDR    | Estimate | SE      | pFDR    | Estimate | SE      | pFDR    | Estimate | SE      | pFDR    |
| Height                  | 0.02187  | 0.00221 | 0       | 0.02912  | 0.00463 | 6.9E-09 | 0.01577  | 0.00558 | 0.08883 | 0.02125  | 0.00489 | 0.00014 | 0.02041  | 0.00417 | 9.3E-06 |
| Weight                  | 0.01638  | 0.00138 | 0       | 0.01885  | 0.00287 | 1.4E-09 | 0.00561  | 0.00369 | 0.42824 | 0.01806  | 0.00304 | 1.2E-07 | 0.02152  | 0.00252 | 0       |
| BMI                     | 0.03136  | 0.00449 | 2.3E-11 | 0.03194  | 0.00947 | 0.00338 | -0.00087 | 0.01218 | 0.95371 | 0.03856  | 0.00979 | 0.00054 | 0.05147  | 0.00799 | 2.5E-09 |
| Hip                     | 0.01381  | 0.00246 | 9.7E-08 | 0.01621  | 0.00515 | 0.00646 | 0.00512  | 0.00642 | 0.62879 | 0.01527  | 0.00544 | 0.01737 | 0.02060  | 0.00450 | 4.1E-05 |
| Waist                   | 0.02044  | 0.00160 | 0       | 0.02554  | 0.00332 | 6.1E-13 | 0.00517  | 0.00422 | 0.52486 | 0.01936  | 0.00357 | 1.3E-06 | 0.02591  | 0.00296 | 0       |
| WHR                     | 2.73127  | 0.21009 | 0       | 3.42852  | 0.42835 | 1.1E-13 | 0.57214  | 0.56234 | 0.5810  | 2.47944  | 0.47198 | 2.6E-06 | 3.23438  | 0.38712 | 3.2E-15 |
| Alcohol at recruitment  | 0.00587  | 0.00106 | 1.2E-07 | 0.00877  | 0.00203 | 0.00014 | 0.00433  | 0.00278 | 0.41571 | 0.00488  | 0.00243 | 0.09165 | 0.00351  | 0.00214 | 0.16522 |
| Potatoes, tubers        | 0.00172  | 0.00022 | 5.9E-14 | 0.00192  | 0.00046 | 0.00020 | 0.00075  | 0.00063 | 0.52486 | 0.00195  | 0.00046 | 0.00024 | 0.00212  | 0.00039 | 9.1E-07 |
| Vegetables              | -0.00066 | 0.00016 | 5.4E-05 | -0.00070 | 0.00033 | 0.07782 | -0.00035 | 0.00038 | 0.5935  | -0.00087 | 0.00035 | 0.03986 | -0.00075 | 0.00030 | 0.03376 |
| Legumes                 | -0.00641 | 0.00104 | 3.6E-09 | -0.00578 | 0.00217 | 0.02514 | -0.00598 | 0.00259 | 0.16649 | -0.00415 | 0.00215 | 0.10772 | -0.00861 | 0.00209 | 0.00028 |
| Fruits, nuts, seeds     | -0.00044 | 0.00012 | 0.00052 | -0.00031 | 0.00025 | 0.33256 | -0.00032 | 0.00029 | 0.57176 | -0.00043 | 0.00026 | 0.18216 | -0.00041 | 0.00022 | 0.13893 |
| Dairy products          | 0.00037  | 0.00008 | 1.0E-05 | 0.00032  | 0.00017 | 0.13220 | 0.00044  | 0.00020 | 0.18644 | 0.00066  | 0.00016 | 0.00042 | 0.00032  | 0.00015 | 0.07502 |
| Cereal                  | -0.00002 | 0.00018 | 0.93372 | -0.00023 | 0.00039 | 0.64779 | -0.00019 | 0.00046 | 0.87537 | -0.00056 | 0.00042 | 0.28408 | 0.00039  | 0.00033 | 0.33636 |
| Meat                    | 0.00172  | 0.00032 | 2.4E-07 | 0.00283  | 0.00064 | 0.00011 | -0.00013 | 0.00085 | 0.91862 | 0.00135  | 0.00071 | 0.11584 | 0.00181  | 0.00060 | 0.01183 |
| Fish and shellfish      | 0.00127  | 0.00054 | 0.02754 | 0.00208  | 0.00108 | 0.11784 | 0.00259  | 0.00124 | 0.22992 | -0.00001 | 0.00127 | 0.99743 | 0.00032  | 0.00106 | 0.80305 |
| Egg                     | 0.00222  | 0.00113 | 0.07186 | 0.00655  | 0.00196 | 0.00366 | -0.00129 | 0.00312 | 0.87537 | 0.00301  | 0.00246 | 0.31035 | -0.00147 | 0.00235 | 0.62003 |
| Fat                     | 0.00045  | 0.00111 | 0.72694 | 0.00035  | 0.00236 | 0.91220 | -0.00823 | 0.00311 | 0.09992 | -0.00164 | 0.00252 | 0.63061 | 0.00567  | 0.00193 | 0.01479 |
| Sugar, confectionary    | 0.00182  | 0.00025 | 8.5E-12 | 0.00119  | 0.00068 | 0.14653 | 0.00260  | 0.00045 | 5.3E-07 | 0.00197  | 0.00053 | 0.00113 | 0.00150  | 0.00054 | 0.01995 |
| Cakes, biscuits         | 0.00072  | 0.00047 | 0.16494 | 0.00013  | 0.00103 | 0.92385 | -0.00035 | 0.00125 | 0.89907 | 0.00012  | 0.00108 | 0.98896 | 0.00179  | 0.00082 | 0.07262 |
| Non-Alcoholic beverages | 0.00016  | 0.00003 | 2.4E-09 | 0.00014  | 0.00005 | 0.03450 | 0.00016  | 0.00006 | 0.11414 | 0.00030  | 0.00005 | 4.1E-07 | 0.00010  | 0.00005 | 0.07502 |
| Alcoholic beverages     | 0.00039  | 0.00006 | 1.3E-10 | 0.00051  | 0.00011 | 3.1E-05 | 0.00031  | 0.00016 | 0.28379 | 0.00034  | 0.00013 | 0.03506 | 0.00029  | 0.00012 | 0.04171 |
| Condiments, sauces      | -0.00299 | 0.00105 | 0.00755 | -0.00631 | 0.00240 | 0.02595 | 0.00118  | 0.00239 | 0.87180 | -0.00498 | 0.00242 | 0.08711 | -0.00291 | 0.00198 | 0.21436 |
| Soups, bouillons        | -0.00028 | 0.00029 | 0.36900 | -0.00020 | 0.00060 | 0.81110 | -0.00222 | 0.00086 | 0.10468 | -0.00083 | 0.00068 | 0.31035 | -0.00001 | 0.00053 | 0.98301 |
| Protein                 | 0.00283  | 0.00072 | 0.00018 | 0.00400  | 0.00150 | 0.02514 | 0.00189  | 0.00182 | 0.58000 | 0.00205  | 0.00161 | 0.30269 | 0.00214  | 0.00137 | 0.18924 |
| Carbohydrate            | 0.00103  | 0.00027 | 0.00022 | 0.00055  | 0.00057 | 0.48747 | 0.00118  | 0.00066 | 0.38471 | 0.00083  | 0.00059 | 0.2555  | 0.00141  | 0.00049 | 0.01726 |
| Fat                     | 0.00110  | 0.00068 | 0.14249 | 0.00054  | 0.00144 | 0.78792 | -0.00075 | 0.00174 | 0.87537 | -0.00040 | 0.00153 | 0.90555 | 0.00186  | 0.00126 | 0.21436 |

|                    |                 |                |          |                 |                |                |                 |                |                |                 |                |                |                 |                |                |
|--------------------|-----------------|----------------|----------|-----------------|----------------|----------------|-----------------|----------------|----------------|-----------------|----------------|----------------|-----------------|----------------|----------------|
| Alcohol            | 0.00562         | 0.00105        | 3.1E-07  | 0.00864         | 0.00200        | 0.00014        | 0.00456         | 0.00272        | 0.39592        | 0.00416         | 0.00243        | 0.15533        | 0.00323         | 0.00212        | 0.19621        |
| Cholestrol         | 0.00084         | 0.00012        | 9E-11    | 0.00112         | 0.00025        | 0.00011        | 0.00046         | 0.00032        | 0.48812        | 0.00080         | 0.00028        | 0.01352        | 0.00069         | 0.00024        | 0.01479        |
| Saturated FA       | 0.00649         | 0.00150        | 4.4E-05  | 0.00464         | 0.00322        | 0.26071        | 0.00358         | 0.00386        | 0.59356        | 0.00481         | 0.00337        | 0.2555         | 0.00788         | 0.00280        | 0.01852        |
| Monounsaturated FA | -0.00087        | 0.00155        | 0.62654  | -0.00136        | 0.00328        | 0.77232        | -0.00592        | 0.00406        | 0.46698        | -0.00651        | 0.00361        | 0.13473        | 0.00157         | 0.00286        | 0.65782        |
| Polyunsaturated FA | -0.00459        | 0.00338        | 0.21772  | -0.00859        | 0.00728        | 0.37042        | -0.01147        | 0.00877        | 0.48812        | -0.00949        | 0.00767        | 0.31035        | 0.00013         | 0.00624        | 0.98301        |
| Dietary fibre      | 0.00341         | 0.00257        | 0.22527  | 0.00505         | 0.00541        | 0.50012        | -0.00185        | 0.00659        | 0.89907        | 0.00649         | 0.00561        | 0.34167        | 0.00301         | 0.00485        | 0.62003        |
| Vit C              | -0.00151        | 0.00033        | 1.2E-05  | -0.00122        | 0.00068        | 0.13872        | -0.00136        | 0.00081        | 0.39592        | -0.00189        | 0.00074        | 0.03185        | -0.00149        | 0.00061        | 0.04171        |
| Beta carotene      | -0.00001        | 0.00001        | 0.24203  | -0.00001        | 0.00002        | 0.51031        | 0.00001         | 0.00002        | 0.59356        | 0.00000         | 0.00002        | 0.96427        | -0.00002        | 0.00001        | 0.25014        |
| Vit E              | -0.01943        | 0.00391        | 2.3E-06  | -0.02551        | 0.00844        | 0.00909        | -0.02751        | 0.01013        | 0.0962         | -0.02954        | 0.00905        | 0.00530        | -0.01264        | 0.00718        | 0.14033        |
| Potassium          | 0.00006         | 0.00002        | 0.00135  | 0.00007         | 0.00004        | 0.13872        | 0.00007         | 0.00005        | 0.48812        | 0.00013         | 0.00004        | 0.00727        | 0.00003         | 0.00004        | 0.50853        |
| Water              | 0.00016         | 0.00002        | 2.9E-13  | 0.00017         | 0.00005        | 0.00088        | 0.00015         | 0.00005        | 0.08883        | 0.00027         | 0.00005        | 1.2E-07        | 0.00012         | 0.00004        | 0.01726        |
| Starch             | 0.00062         | 0.00040        | 0.16494  | 0.00028         | 0.00087        | 0.81110        | -0.00030        | 0.00104        | 0.89907        | -0.00093        | 0.00094        | 0.42214        | 0.00191         | 0.00073        | 0.02937        |
| Calcium            | 0.00015         | 0.00005        | 0.00358  | 0.00009         | 0.00010        | 0.51031        | 0.00019         | 0.00012        | 0.41571        | 0.00023         | 0.00010        | 0.05248        | 0.00010         | 0.00009        | 0.34426        |
| Phosphorus         | 0.00019         | 0.00004        | 1.2E-05  | 0.00024         | 0.00009        | 0.01932        | 0.00014         | 0.00010        | 0.48812        | 0.00022         | 0.00009        | 0.03819        | 0.00015         | 0.00008        | 0.12451        |
| Iron               | 0.00372         | 0.00473        | 0.48151  | 0.01212         | 0.00982        | 0.34323        | -0.01043        | 0.01224        | 0.62339        | -0.00475        | 0.01066        | 0.76098        | 0.00266         | 0.00893        | 0.80305        |
| Sugar              | 0.00184         | 0.00045        | 9.8E-05  | 0.00081         | 0.00097        | 0.52030        | 0.00315         | 0.00108        | 0.08883        | 0.00287         | 0.00096        | 0.01185        | 0.00150         | 0.00085        | 0.14033        |
| Magnesium          | 0.00040         | 0.00018        | 0.03922  | 0.00027         | 0.00039        | 0.60528        | 0.00037         | 0.00046        | 0.62879        | 0.00082         | 0.00039        | 0.08615        | 0.00014         | 0.00035        | 0.74782        |
| Retinol            | 0.00008         | 0.00002        | 0.00028  | 0.00006         | 0.00005        | 0.39948        | 0.00008         | 0.00005        | 0.41571        | 0.00010         | 0.00004        | 0.02183        | 0.00009         | 0.00004        | 0.04329        |
| Riboflavin         | 0.09140         | 0.02583        | 0.00079  | 0.09505         | 0.05445        | 0.14653        | 0.08348         | 0.06510        | 0.49654        | 0.16410         | 0.05476        | 0.01185        | 0.04246         | 0.05007        | 0.49271        |
| Thiamin            | 0.06059         | 0.03979        | 0.16603  | 0.07230         | 0.08398        | 0.51679        | -0.02525        | 0.10285        | 0.89907        | 0.14738         | 0.08531        | 0.15235        | 0.01054         | 0.07634        | 0.92197        |
| Vit B12            | 0.01746         | 0.00440        | 0.00017  | 0.02111         | 0.00896        | 0.05029        | 0.02379         | 0.01031        | 0.16649        | 0.01423         | 0.01005        | 0.2555         | 0.01427         | 0.00856        | 0.16305        |
| Vit B6             | 0.11690         | 0.03184        | 0.00051  | 0.15384         | 0.06664        | 0.05366        | 0.08723         | 0.08066        | 0.57176        | 0.09962         | 0.07096        | 0.2555         | 0.11042         | 0.06013        | 0.13412        |
| Vit D              | 0.02175         | 0.00511        | 5.3E-05  | 0.02670         | 0.01017        | 0.02595        | 0.02143         | 0.01286        | 0.39592        | -0.00759        | 0.01414        | 0.70475        | 0.02933         | 0.00882        | 0.00480        |
| Protein-animal     | 0.00450         | 0.00086        | 6.7E-07  | 0.00682         | 0.00178        | 0.00075        | 0.00297         | 0.00220        | 0.48812        | 0.00390         | 0.00192        | 0.09165        | 0.00328         | 0.00165        | 0.10403        |
| Protein-plant      | -0.00293        | 0.00197        | 0.17284  | -0.00358        | 0.00419        | 0.51679        | -0.00197        | 0.00492        | 0.87537        | -0.00419        | 0.00440        | 0.44132        | -0.00435        | 0.00375        | 0.33757        |
| Fat-animal         | 0.00679         | 0.00106        | 7.2E-10  | 0.00788         | 0.00221        | 0.00171        | 0.00251         | 0.00280        | 0.59356        | 0.00609         | 0.00236        | 0.03185        | 0.00641         | 0.00200        | 0.00702        |
| Fat-plant          | -0.00989        | 0.00134        | 1.49E-12 | -0.01160        | 0.00288        | 0.00037        | -0.01180        | 0.00344        | 0.02662        | -0.01511        | 0.00317        | 2.3E-05        | -0.00620        | 0.00241        | 0.03128        |
| Energy             | 0.00014         | 0.00003        | 4.85E-05 | 0.00013         | 0.00007        | 0.11784        | 0.00009         | 0.00008        | 0.52554        | 0.00008         | 0.00007        | 0.36166        | 0.00015         | 0.00006        | 0.03128        |
| Folate             | -0.00026        | 0.00017        | 0.17284  | -0.00023        | 0.00036        | 0.62962        | -0.00015        | 0.00043        | 0.89647        | -0.00003        | 0.00037        | 0.98896        | -0.00064        | 0.00034        | 0.12451        |
| <b>MED_score</b>   | <b>-0.05833</b> | <b>0.00680</b> | <b>0</b> | <b>-0.05496</b> | <b>0.01437</b> | <b>0.00075</b> | <b>-0.02647</b> | <b>0.01698</b> | <b>0.41571</b> | <b>-0.07605</b> | <b>0.01514</b> | <b>7.4E-06</b> | <b>-0.06738</b> | <b>0.01285</b> | <b>1.9E-06</b> |

|                              |                |                |                |                |                |                |                 |                |                |                |                |                |                |                |                |
|------------------------------|----------------|----------------|----------------|----------------|----------------|----------------|-----------------|----------------|----------------|----------------|----------------|----------------|----------------|----------------|----------------|
| ISD                          | 0.00468        | 0.02030        | 0.84966        | -0.01055       | 0.04285        | 0.85466        | -0.00250        | 0.05093        | 0.96077        | 0.00093        | 0.04497        | 0.99743        | 0.02546        | 0.03842        | 0.60474        |
| ISD-no alcohol               | 0.00989        | 0.02032        | 0.67280        | -0.00317       | 0.04291        | 0.95208        | 0.00424         | 0.05099        | 0.95371        | 0.00059        | 0.04497        | 0.99743        | 0.03134        | 0.03847        | 0.50853        |
| <b>MI</b>                    | <b>0.43936</b> | <b>0.15050</b> | <b>0.00610</b> | <b>0.60927</b> | <b>0.29199</b> | <b>0.08237</b> | <b>-0.84147</b> | <b>0.70899</b> | <b>0.52486</b> | <b>0.95435</b> | <b>0.26231</b> | <b>0.00159</b> | <b>0.29318</b> | <b>0.30402</b> | <b>0.42223</b> |
| Stroke                       | 0.02871        | 0.12642        | 0.84966        | 0.04226        | 0.26535        | 0.91220        | -0.10001        | 0.33820        | 0.89907        | -0.37190       | 0.33730        | 0.36166        | 0.36257        | 0.20428        | 0.14033        |
| Hypertension                 | <b>0.16478</b> | <b>0.04558</b> | <b>0.00060</b> | <b>0.21041</b> | <b>0.09560</b> | <b>0.06896</b> | <b>-0.05622</b> | <b>0.12076</b> | <b>0.87537</b> | <b>0.07072</b> | <b>0.10309</b> | <b>0.61234</b> | <b>0.43863</b> | <b>0.08157</b> | <b>1.1E-06</b> |
| Diabetes                     | 0.27044        | 0.11585        | 0.02951        | 0.51036        | 0.21776        | 0.05034        | -0.16087        | 0.35736        | 0.87537        | 0.16907        | 0.27121        | 0.64407        | 0.53479        | 0.19306        | 0.01995        |
| <b>CVD</b>                   | <b>0.22350</b> | <b>0.04445</b> | <b>1.7E-06</b> | <b>0.30437</b> | <b>0.09258</b> | <b>0.00418</b> | <b>-0.02720</b> | <b>0.11809</b> | <b>0.90061</b> | <b>0.28303</b> | <b>0.09750</b> | <b>0.01352</b> | <b>0.36289</b> | <b>0.08167</b> | <b>7.0E-05</b> |
| METS household activity      | -0.00190       | 0.00055        | 0.00105        | -0.00287       | 0.00119        | 0.04348        | -0.00242        | 0.00139        | 0.39592        | -0.00151       | 0.00121        | 0.30992        | -0.00114       | 0.00102        | 0.34426        |
| METS recreational activity   | 0.00092        | 0.00084        | 0.31942        | 0.00047        | 0.00179        | 0.84933        | 0.00057         | 0.00212        | 0.89907        | 0.00394        | 0.00175        | 0.06054        | -0.00068       | 0.00163        | 0.74782        |
| METS household/ recreational | -0.00105       | 0.00045        | 0.02951        | -0.00183       | 0.00097        | 0.12109        | -0.00150        | 0.00114        | 0.48812        | 0.00010        | 0.00097        | 0.98896        | -0.00098       | 0.00085        | 0.33757        |
| Total PA Sx (Active)         | 0.08068        | 0.06255        | 0.23819        | -0.05712       | 0.14014        | 0.77232        | 0.26405         | 0.14694        | 0.38471        | 0.29706        | 0.12770        | 0.05248        | 0.01058        | 0.12110        | 0.95229        |
| Sedentary occupation         | -0.13943       | 0.04673        | 0.00505        | -0.06937       | 0.09720        | 0.59088        | 0.07487         | 0.11189        | 0.72993        | -0.21987       | 0.10573        | 0.08615        | -0.31152       | 0.09213        | 0.00430        |
| Standing occupation          | -0.28185       | 0.05076        | 1.2E-07        | -0.42631       | 0.11220        | 0.00078        | -0.04527        | 0.11929        | 0.87537        | -0.49707       | 0.12051        | 0.00029        | -0.23736       | 0.09443        | 0.03466        |
| Manual work                  | 0.18032        | 0.06258        | 0.0066         | 0.14058        | 0.13512        | 0.43964        | 0.20565         | 0.15589        | 0.48812        | 0.37594        | 0.12851        | 0.01352        | 0.18223        | 0.11789        | 0.19324        |
| Heavy manual work            | 0.07901        | 0.11809        | 0.55440        | 0.38136        | 0.21772        | 0.14653        | -0.19455        | 0.33735        | 0.80459        | 0.00087        | 0.27119        | 0.99743        | 0.08829        | 0.22170        | 0.75087        |
| Cambridge PA                 | -0.00187       | 0.02011        | 0.93372        | 0.02770        | 0.04250        | 0.62180        | 0.05515         | 0.05039        | 0.57176        | 0.02037        | 0.04450        | 0.76078        | -0.04786       | 0.03804        | 0.30204        |
| Cambridge PA (Active)        | 0.09018        | 0.05080        | 0.10477        | 0.22395        | 0.10362        | 0.07414        | 0.10633         | 0.12700        | 0.62518        | 0.14861        | 0.11058        | 0.27802        | 0.05663        | 0.09677        | 0.63920        |
| IARC PA                      | 0.07288        | 0.02506        | 0.0062         | 0.04531        | 0.05296        | 0.51679        | 0.01614         | 0.06283        | 0.89907        | 0.13223        | 0.05577        | 0.04820        | 0.05634        | 0.04721        | 0.33191        |
| IARC PA (Intense)            | 0.10212        | 0.04259        | 0.02611        | 0.05797        | 0.09071        | 0.62304        | 0.01013         | 0.10847        | 0.95371        | 0.20643        | 0.09321        | 0.06471        | 0.08781        | 0.08045        | 0.35719        |
| Currently smoke cigarette    | -0.13060       | 0.05131        | 0.01759        | -0.16307       | 0.10961        | 0.24291        | -0.12977        | 0.12885        | 0.58101        | -0.10672       | 0.11300        | 0.44132        | -0.16103       | 0.09759        | 0.16522        |
| Currently smoke cigars       | -0.15341       | 0.17273        | 0.42308        | 0.01931        | 0.33618        | 0.95420        | -0.45307        | 0.50266        | 0.59356        | -0.00785       | 0.35651        | 0.99743        | -0.10981       | 0.31861        | 0.78445        |
| Ever smoker                  | 0.15659        | 0.04096        | 0.00028        | 0.18391        | 0.08674        | 0.07782        | -0.01743        | 0.10247        | 0.91862        | 0.16807        | 0.09091        | 0.12471        | 0.16998        | 0.07725        | 0.06906        |
| Current smoker               | -0.10779       | 0.04986        | 0.0444         | -0.08863       | 0.10487        | 0.51679        | -0.12338        | 0.12579        | 0.59208        | -0.08116       | 0.10979        | 0.57970        | -0.16091       | 0.09542        | 0.15964        |
| Smoking duration             | 0.00992        | 0.00132        | 5.9E-13        | 0.01330        | 0.00273        | 1.9E-05        | 0.00055         | 0.00352        | 0.91862        | 0.01250        | 0.00288        | 0.00014        | 0.00993        | 0.00249        | 0.00043        |
| Cigarette smoking duration   | 0.00885        | 0.00137        | 6.4E-10        | 0.01170        | 0.00286        | 0.00030        | 0.00066         | 0.00362        | 0.91862        | 0.01087        | 0.00301        | 0.00165        | 0.00873        | 0.00259        | 0.00430        |
| Currently smoking >15/day    | -0.15371       | 0.08160        | 0.08362        | -0.18975       | 0.17484        | 0.41667        | -0.21972        | 0.21089        | 0.58000        | -0.01564       | 0.17103        | 0.98896        | -0.28836       | 0.16302        | 0.14033        |
| Currently smoking >25/day    | 0.02388        | 0.15755        | 0.90024        | 0.36283        | 0.28082        | 0.32850        | -0.46781        | 0.50269        | 0.59356        | 0.49528        | 0.28119        | 0.14470        | -0.35003       | 0.35570        | 0.41592        |
| Education                    | -0.11965       | 0.01792        | 1.5E-10        | -0.11527       | 0.03784        | 0.00876        | -0.03532        | 0.04442        | 0.62879        | -0.13106       | 0.03987        | 0.00517        | -0.17386       | 0.03418        | 3.9E-06        |



**Supplementary Table 6.** Estimates and SE of the significant (P<0.05) associated exposures from meta-analysis of per-country Cox model coefficients adjusted for age and gender (upper part) and estimates and SE of the significant associated exposures of Cox model adjusted for country, age, and sex (lower part)

| Exposure                         | BCL          |              | CLL      |       | FL       |       | DLBCL        |              | MM           |              |
|----------------------------------|--------------|--------------|----------|-------|----------|-------|--------------|--------------|--------------|--------------|
|                                  | Estimate     | SE           | Estimate | SE    | Estimate | SE    | Estimate     | SE           | Estimate     | SE           |
| Height                           | <b>0.014</b> | <b>0.003</b> | 0.019    | 0.008 | 0.020    | 0.008 | 0.016        | 0.007        |              |              |
| Weight                           | 0.006        | 0.002        |          |       |          |       | <b>0.013</b> | <b>0.003</b> | <b>0.013</b> | <b>0.003</b> |
| BMI                              |              |              |          |       |          |       | 0.030        | 0.011        | <b>0.032</b> | <b>0.009</b> |
| Hip circumference                | 0.010        | 0.003        |          |       |          |       | 0.012        | 0.006        | <b>0.017</b> | <b>0.005</b> |
| Waist circumference              | 0.005        | 0.002        |          |       |          |       |              |              | 0.011        | 0.004        |
| Dairy products                   | 0.0002       | 0.0001       |          |       |          |       |              |              |              |              |
| Total saturated fatty acids      | 0.004        | 0.002        |          |       |          |       |              |              |              |              |
| Total fats, animal origin        | 0.003        | 0.001        |          |       |          |       |              |              |              |              |
| Sugar and confectionary          |              |              |          |       | 0.004    | 0.001 |              |              |              |              |
| Sugar                            |              |              |          |       | 0.003    | 0.001 |              |              |              |              |
| Condiments and sauces            | -0.002       | 0.001        |          |       |          |       |              |              |              |              |
| Egg and egg products             |              |              | 0.005    | 0.002 |          |       | 0.005        | 0.002        |              |              |
| Vit D                            |              |              |          |       |          |       | -0.041       | 0.018        |              |              |
| METS recreational activity       |              |              |          |       |          |       | 0.004        | 0.002        |              |              |
| Total PA (sex-specific) (Active) | 0.146        | 0.064        |          |       | 0.370    | 0.152 | 0.388        | 0.132        |              |              |
| Manual work                      | 0.166        | 0.064        |          |       |          |       | <b>0.419</b> | <b>0.135</b> | 0.248        | 0.122        |
| Diabetes                         |              |              | 0.498    | 0.225 |          |       |              |              | 0.325        | 0.367        |
| MI                               |              |              |          |       |          |       | 0.606        | 0.266        |              |              |
| Stroke                           |              |              |          |       |          |       |              |              | 0.505        | 0.212        |
| Currently smoking >25/day        |              |              | 0.868    | 0.287 | 1.212    | 0.549 | <b>0.928</b> | <b>0.284</b> |              |              |
| Height                           | <b>0.014</b> | <b>0.003</b> | 0.018    | 0.007 | 0.020    | 0.008 | 0.016        | 0.007        |              |              |
| Weight                           | <b>0.007</b> | <b>0.002</b> |          |       |          |       | 0.012        | 0.004        | <b>0.012</b> | <b>0.003</b> |
| BMI                              | 0.011        | 0.005        |          |       |          |       | 0.025        | 0.011        | <b>0.031</b> | <b>0.009</b> |
| Hip circumference                | <b>0.010</b> | <b>0.003</b> |          |       |          |       | 0.012        | 0.006        | <b>0.017</b> | <b>0.005</b> |
| Waist circumference              | 0.005        | 0.002        |          |       |          |       |              |              | 0.010        | 0.004        |

|                                  |        |       |        |       |              |              |               |
|----------------------------------|--------|-------|--------|-------|--------------|--------------|---------------|
| Total fats, animal origin        | 0.003  | 0.001 |        |       |              |              |               |
| Total saturated fatty acids      | 0.003  | 0.002 |        |       |              |              |               |
| Condiments and sauces            | -0.002 | 0.001 | -0.005 | 0.003 |              |              |               |
| Total fats, plant origin         |        |       | -0.008 | 0.004 |              |              |               |
| Sugar and confectionary          |        |       |        |       | <b>0.002</b> | <b>0.001</b> |               |
| Sugar                            |        |       |        |       | 0.002        | 0.001        |               |
| Dairy products                   | 0.0002 | 0.025 |        |       |              |              | 0.0004 0.0002 |
| Vit D                            |        |       |        |       |              |              | -0.043 0.018  |
| Manual work                      | 0.156  | 0.064 |        |       |              |              | 0.354 0.132   |
| Total PA (sex-specific) (Active) | 0.130  | 0.064 |        |       | 0.307        | 0.150        | 0.355 0.130   |
| Current smoker                   | -0.108 | 0.051 |        |       |              |              |               |
| Currently smoking >25/day        |        |       |        |       |              |              | 0.706 0.283   |

Bold: significant after FDR multiple testing correction

**Supplementary Table 7 (Excel file).** Standard Cox regression for individual exposure adjusted for country stratified by age and sex in total BCL and subtypes

**Supplementary Table 8 (Excel file).** Component loading across the components and the total variance explained by each component from PCA analysis

**Supplementary Table 9.** HRs and 95%CI of the significant (p<0.05) principal components for total BCL and major subtypes adjusted for age, gender, and country

| PC | Exposure                                   | Loading | BCL                     |              | CLL         |   | FL               |      | DLBCL            |       | MM                      |               |
|----|--------------------------------------------|---------|-------------------------|--------------|-------------|---|------------------|------|------------------|-------|-------------------------|---------------|
|    |                                            |         | HR (95% CI)             | P            | HR (95% CI) | P | HR (95% CI)      | P    | HR (95% CI)      | P     |                         |               |
| 5  | Weight                                     | 0.915   | <b>1.08 (1.03-1.13)</b> | <b>0.001</b> |             |   |                  |      | 1.13 (1.03-1.25) | 0.01  | <b>1.16 (1.07-1.26)</b> | <b>0.0003</b> |
|    | Waist circumference                        | 0.901   |                         |              |             |   |                  |      |                  |       |                         |               |
|    | Body Mass Index                            | 0.895   |                         |              |             |   |                  |      |                  |       |                         |               |
|    | Hip circumference                          | 0.822   |                         |              |             |   |                  |      |                  |       |                         |               |
|    | WHR                                        | 0.596   |                         |              |             |   |                  |      |                  |       |                         |               |
| 7  | Dairy products                             | 0.896   | 1.05 (1.01-1.09)        | 0.02         |             |   |                  |      | 1.09 (1.01-1.19) | 0.04  |                         |               |
|    | Calcium (mg)                               | 0.806   |                         |              |             |   |                  |      |                  |       |                         |               |
|    | Riboflavin, B2 (mg)                        | 0.626   |                         |              |             |   |                  |      |                  |       |                         |               |
|    | Phosphorus (mg)                            | 0.546   |                         |              |             |   |                  |      |                  |       |                         |               |
| 10 | Cambridge physical activity index          | 0.821   | 1.04 (1.01-1.08)        | 0.04         |             |   |                  |      | 1.10 (1.01-1.20) | 0.04  |                         |               |
|    | Cambridge physical activity index (Active) | 0.813   |                         |              |             |   |                  |      |                  |       |                         |               |
|    | Manual work                                | 0.686   |                         |              |             |   |                  |      |                  |       |                         |               |
|    | Total PA (sex-specific) (Active)           | 0.659   |                         |              |             |   |                  |      |                  |       |                         |               |
| 11 | Sugar (g)                                  | 0.741   |                         |              |             |   | 1.11 (1.02-1.21) | 0.02 |                  |       |                         |               |
|    | Sugar and confectionary                    | 0.662   |                         |              |             |   |                  |      |                  |       |                         |               |
|    | Cakes and biscuits                         | 0.635   |                         |              |             |   |                  |      |                  |       |                         |               |
|    | Carbohydrates (g)                          | 0.546   |                         |              |             |   |                  |      |                  |       |                         |               |
| 12 | Non-alcoholic beverages                    | 0.848   |                         |              |             |   |                  |      |                  |       | 1.13 (1.01-1.25)        | 0.03          |
|    | Water (g)                                  | 0.710   |                         |              |             |   |                  |      |                  |       |                         |               |
| 15 | Fish and shellfish                         | 0.797   |                         |              |             |   |                  |      | 0.84 (0.75-0.95) | 0.004 |                         |               |
|    | Vitamin D (µg)                             | 0.771   |                         |              |             |   |                  |      |                  |       |                         |               |

Bold: significant after FDR multiple testing correction

**Supplementary Table 10.** Multivariate Cox regression of the principal components for total BCL and major subtypes mutually adjusted for other PCs stratified by age

| PC | HR (95% CI)             |                         |                         |                         |                  |                         |                         |                         |                         |                         |
|----|-------------------------|-------------------------|-------------------------|-------------------------|------------------|-------------------------|-------------------------|-------------------------|-------------------------|-------------------------|
|    | BCL                     |                         | CLL                     |                         | FL               |                         | DLBCL                   |                         | MM                      |                         |
|    | Age≤55                  | Age>55                  | Age≤55                  | Age>55                  | Age≤55           | Age>55                  | Age≤55                  | Age>55                  | Age≤55                  | Age>55                  |
| 1  | 0.95 (0.88-1.03)        | 0.93 (0.87-1.01)        | 0.97 (0.82-1.16)        | 0.92 (0.79-1.07)        | 0.97 (0.82-1.15) | 0.95 (0.76-1.18)        | 1.02 (0.87-1.21)        | 0.92 (0.78-1.09)        | 0.90 (0.76-1.05)        | 0.91 (0.79-1.04)        |
| 2  | 0.97 (0.91-1.05)        | 1.06 (1.00-1.14)        | 1.00 (0.85-1.18)        | <b>1.15 (1.01-1.31)</b> | 0.92 (0.78-1.09) | 1.03 (0.84-1.27)        | 0.94 (0.80-1.10)        | 1.01 (0.87-1.18)        | 1.03 (0.89-1.19)        | 0.98 (0.86-1.10)        |
| 3  | 0.96 (0.90-1.02)        | 1.00 (0.95-1.06)        | 0.90 (0.78-1.05)        | 1.01 (0.90-1.13)        | 0.98 (0.85-1.12) | 0.90 (0.75-1.08)        | 0.89 (0.77-1.03)        | 1.10 (0.97-1.24)        | 1.06 (0.94-1.21)        | 0.94 (0.84-1.04)        |
| 4  | 1.03 (0.97-1.10)        | 1.05 (0.98-1.12)        | 1.07 (0.93-1.24)        | 0.96 (0.84-1.10)        | 1.01 (0.87-1.18) | 1.06 (0.88-1.28)        | 0.95 (0.82-1.11)        | 1.03 (0.89-1.19)        | 1.09 (0.96-1.23)        | 1.06 (0.95-1.19)        |
| 5  | <b>1.11 (1.03-1.20)</b> | 1.06 (0.99-1.13)        | <b>1.20 (1.02-1.41)</b> | 0.96 (0.84-1.10)        | 1.06 (0.90-1.26) | 0.94 (0.76-1.15)        | 1.12 (0.95-1.31)        | 1.16 (1.00-1.34)        | 1.12 (0.97-1.30)        | <b>1.18 (1.06-1.33)</b> |
| 6  | 0.99 (0.92-1.07)        | 1.02 (0.95-1.09)        | 0.88 (0.74-1.05)        | 0.94 (0.81-1.09)        | 1.00 (0.84-1.18) | 0.89 (0.71-1.12)        | 0.88 (0.74-1.06)        | 1.02 (0.87-1.20)        | 1.10 (0.96-1.27)        | 1.03 (0.91-1.17)        |
| 7  | <b>1.06 (1.00-1.13)</b> | 1.03 (0.98-1.09)        | 1.07 (0.93-1.22)        | 0.97 (0.86-1.08)        | 1.11 (0.98-1.26) | 1.05 (0.89-1.24)        | 1.09 (0.96-1.24)        | <b>1.15 (1.02-1.29)</b> | 1.02 (0.90-1.16)        | 1.02 (0.92-1.13)        |
| 8  | 0.96 (0.90-1.03)        | 1.04 (0.98-1.10)        | 0.97 (0.84-1.13)        | 0.98 (0.87-1.10)        | 0.91 (0.78-1.05) | 1.03 (0.88-1.22)        | 1.01 (0.88-1.17)        | 1.06 (0.94-1.20)        | 0.93 (0.81-1.06)        | 1.05 (0.95-1.16)        |
| 9  | 1.02 (0.96-1.09)        | 1.02 (0.97-1.08)        | 1.01 (0.88-1.16)        | 1.06 (0.96-1.18)        | 1.12 (0.99-1.27) | 0.95 (0.78-1.16)        | 1.03 (0.91-1.17)        | 1.00 (0.87-1.15)        | 0.97 (0.85-1.10)        | 0.98 (0.87-1.09)        |
| 10 | 1.02 (0.96-1.08)        | <b>1.09 (1.03-1.16)</b> | 1.05 (0.91-1.21)        | 1.08 (0.96-1.22)        | 1.07 (0.93-1.22) | 1.09 (0.91-1.31)        | 1.04 (0.91-1.19)        | <b>1.17 (1.03-1.33)</b> | 1.02 (0.90-1.16)        | 1.08 (0.97-1.20)        |
| 11 | 1.04 (0.98-1.11)        | 1.04 (0.98-1.10)        | 1.03 (0.90-1.19)        | 0.95 (0.85-1.07)        | 1.11 (0.98-1.26) | <b>1.18 (1.01-1.38)</b> | 1.06 (0.94-1.20)        | 1.06 (0.93-1.20)        | 1.02 (0.90-1.15)        | 1.02 (0.93-1.13)        |
| 12 | 1.01 (0.91-1.12)        | 1.09 (0.99-1.20)        | 1.07 (0.86-1.33)        | 1.06 (0.87-1.28)        | 1.00 (0.81-1.25) | 1.00 (0.75-1.33)        | 1.00 (0.80-1.25)        | 1.17 (0.96-1.44)        | 1.11 (0.91-1.36)        | 1.08 (0.91-1.27)        |
| 13 | 1.01 (0.92-1.10)        | 1.05 (0.97-1.14)        | 1.02 (0.84-1.24)        | 0.98 (0.83-1.15)        | 1.02 (0.84-1.24) | 1.02 (0.80-1.31)        | 1.02 (0.84-1.24)        | <b>1.20 (1.01-1.43)</b> | 1.01 (0.85-1.20)        | 1.09 (0.95-1.26)        |
| 14 | <b>0.92 (0.86-0.99)</b> | 1.01 (0.95-1.07)        | 0.96 (0.83-1.11)        | 0.99 (0.89-1.11)        | 0.88 (0.75-1.03) | 0.95 (0.81-1.13)        | 0.92 (0.80-1.07)        | 1.04 (0.93-1.18)        | 0.95 (0.83-1.12)        | 1.06 (0.96-1.17)        |
| 15 | 1.00 (0.93-1.08)        | 0.98 (0.91-1.06)        | 1.11 (0.96-1.29)        | 0.98 (0.84-1.14)        | 1.10 (0.95-1.27) | 0.98 (0.78-1.25)        | <b>0.77 (0.64-0.93)</b> | 0.97 (0.81-1.15)        | 1.01 (0.86-1.17)        | 1.08 (0.95-1.22)        |
| 16 | 0.97 (0.90-1.05)        | 1.06 (0.99-1.14)        | 1.06 (0.90-1.25)        | 1.04 (0.90-1.20)        | 1.03 (0.87-1.23) | 1.15 (0.93-1.43)        | 0.89 (0.75-1.05)        | 1.15 (0.98-1.35)        | 0.96 (0.82-1.12)        | 0.98 (0.86-1.11)        |
| 17 | 0.95 (0.88-1.03)        | 0.95 (0.88-1.02)        | 0.97 (0.81-1.17)        | 0.87 (0.75-1.03)        | 0.98 (0.83-1.17) | 0.89 (0.70-1.13)        | 1.06 (0.90-1.26)        | 1.00 (0.88-1.19)        | <b>0.83 (0.70-0.98)</b> | 0.97 (0.85-1.12)        |
| 18 | 1.01 (0.95-1.07)        | 0.99 (0.92-1.06)        | 1.06 (0.94-1.20)        | 0.97 (0.84-1.12)        | 0.99 (0.86-1.14) | 1.00 (0.79-1.26)        | 1.07 (0.96-1.21)        | 1.02 (0.88-1.19)        | 0.93 (0.81-1.06)        | 0.94 (0.82-1.09)        |
| 19 | 0.99 (0.93-1.06)        | 1.00 (0.94-1.07)        | 0.91 (0.78-1.07)        | 0.99 (0.87-1.11)        | 0.99 (0.85-1.15) | 1.10 (0.94-1.29)        | 0.99 (0.85-1.15)        | 1.04 (0.90-1.20)        | 0.99 (0.86-1.14)        | 1.00 (0.90-1.12)        |
| 20 | 0.98 (0.92-1.04)        | 0.98 (0.91-1.05)        | 0.91 (0.80-1.04)        | 0.94 (0.82-1.09)        | 1.01 (0.89-1.14) | 0.88 (0.71-1.09)        | 0.88 (0.76-1.01)        | 1.00 (0.86-1.17)        | 1.07 (0.95-1.20)        | 0.99 (0.87-1.12)        |
| 21 | 0.97 (0.90-1.05)        | 1.03 (0.98-1.08)        | 0.99 (0.84-1.17)        | 1.03 (0.94-1.13)        | 0.96 (0.81-1.15) | 0.87 (0.72-1.06)        | 1.03 (0.88-1.21)        | 1.06 (0.96-1.17)        | 0.89 (0.75-1.07)        | 1.06 (0.98-1.14)        |
| 22 | 0.98 (0.93-1.04)        | 0.97 (0.92-1.03)        | 1.06 (0.96-1.17)        | 1.01 (0.91-1.12)        | 0.91 (0.80-1.05) | 0.98 (0.82-1.16)        | 0.98 (0.89-1.09)        | 0.89 (0.76-1.03)        | 0.92 (0.81-1.04)        | 1.04 (0.95-1.14)        |

Model included sex, country, age, and all PCs. Bold: significant at p<0.05

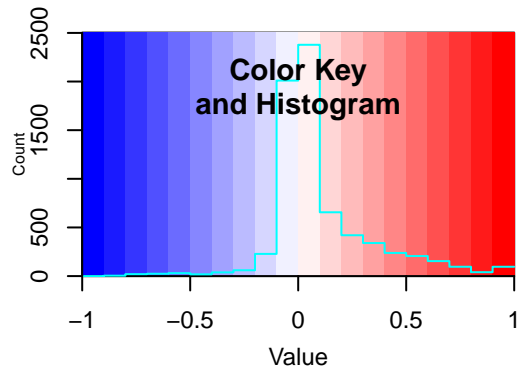

**Supplementary Figure 1.** Heatmap of age-, sex- and country- adjusted Spearman correlation between each two variables.

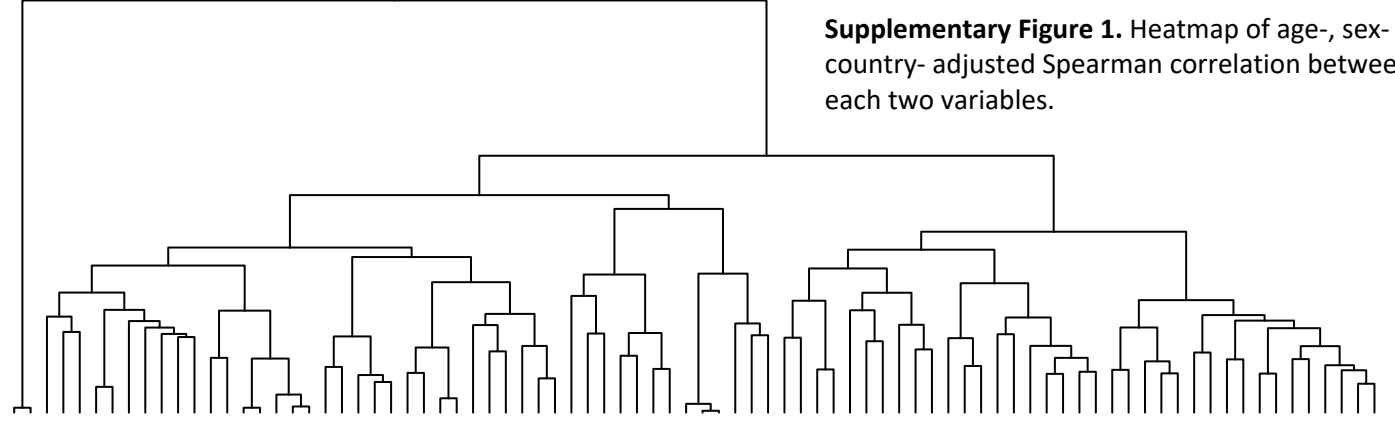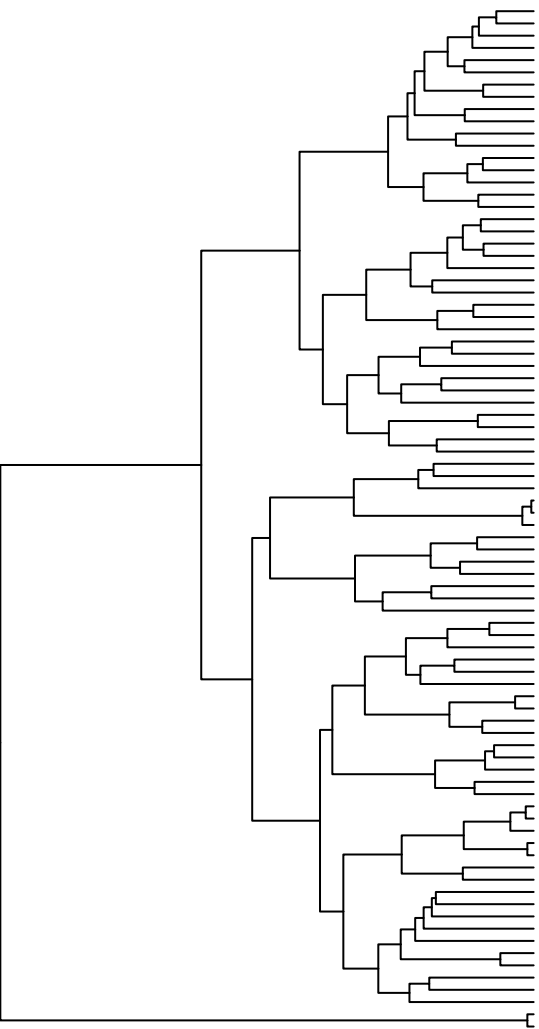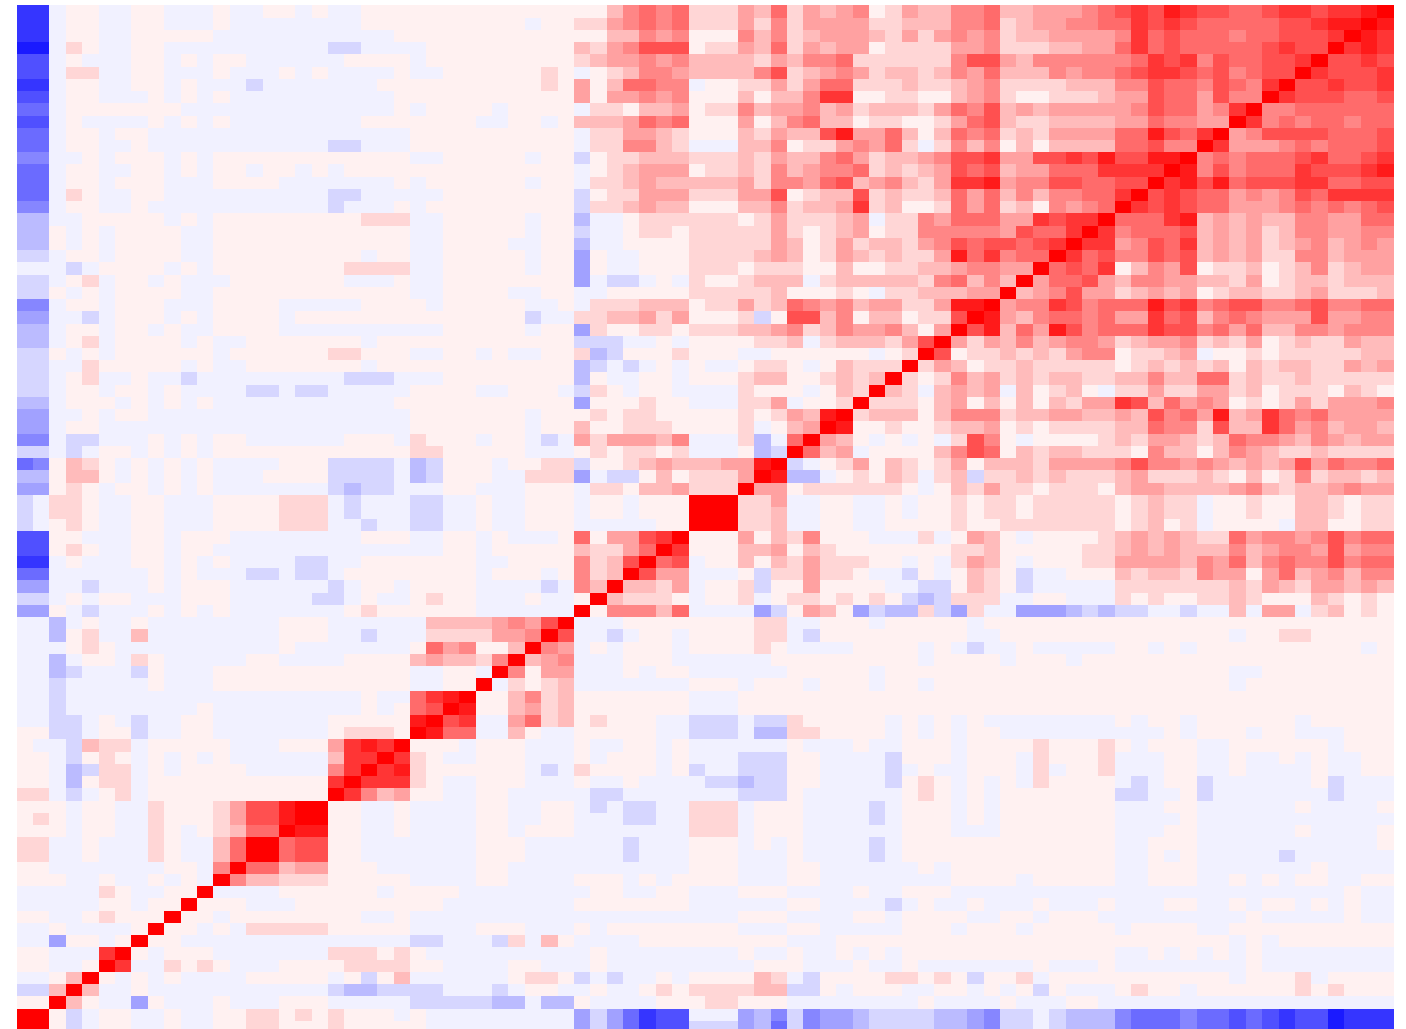

- K
- Vit\_B6
- Vit\_B1
- Folate
- Fe
- Mg
- dietary\_fibre
- proteins\_plant
- polyunsaturated\_FA
- Vit\_E
- Carbohydrates
- Sugar
- Protein
- Energy
- Vit\_B2
- Ca
- proteins\_animal
- Vit\_B12
- Cholesterol
- fats\_animal
- Meat
- Retinol
- Egg
- Total\_Fat
- Monounsaturated\_FA
- saturated\_FA
- Vit\_D
- Fish\_shellfish
- Potatoes\_tubers
- Sugar\_confectionary
- Cakes\_biscuits
- Dairy
- Starch
- Cereal
- fats\_plant
- Fat
- Water
- Non-alcoholic\_beverages
- Condiments\_sauces
- Alcohol
- Alc\_recruitment
- Alcoholic\_beverages
- Vegetables
- Beta\_carotene
- Vit\_C
- Fruits\_nuts\_seeds
- Legumes
- Soups\_bouillons
- MED\_score
- Cambridge\_PA\_index
- Cambridge\_PA\_index
- METS\_Recreational
- PA\_SX\_specific\_Active
- Manual\_work
- Heavy\_manual\_work
- IARC\_PA\_score
- IARC\_PA\_score\_Inter
- Mets\_hhld-Recr
- METS\_Household
- Weight
- Hip
- Bmi
- Waist
- Whr
- Dur\_Smoke
- Dur\_Cig
- Smoke\_ever
- Smoke\_cur
- Cigaret
- Current-smoke>15/d
- Current-smoke>25/d
- MI
- Diabetes
- Stroke
- Cigars
- Standing\_occupation
- Hypertension
- CVD
- Height
- Education
- Sedentary\_occupation
- zISD
- zISD

**Supplementary Figure 2.** Circos plot showing Spearman correlation of exposures adjusted for age, sex, and country in the data. For each exposure in the 9 categories the absolute correlations (>0.2) with all other exposures are depicted; Exposures in nutrient group are nutrient density from EPIC Nutrient Data Base (ENDB); Alcohol intake group includes alcohol intake at recruitment time (g/day). See the Supplementary Table 2 for name, type, and unit of the exposures.

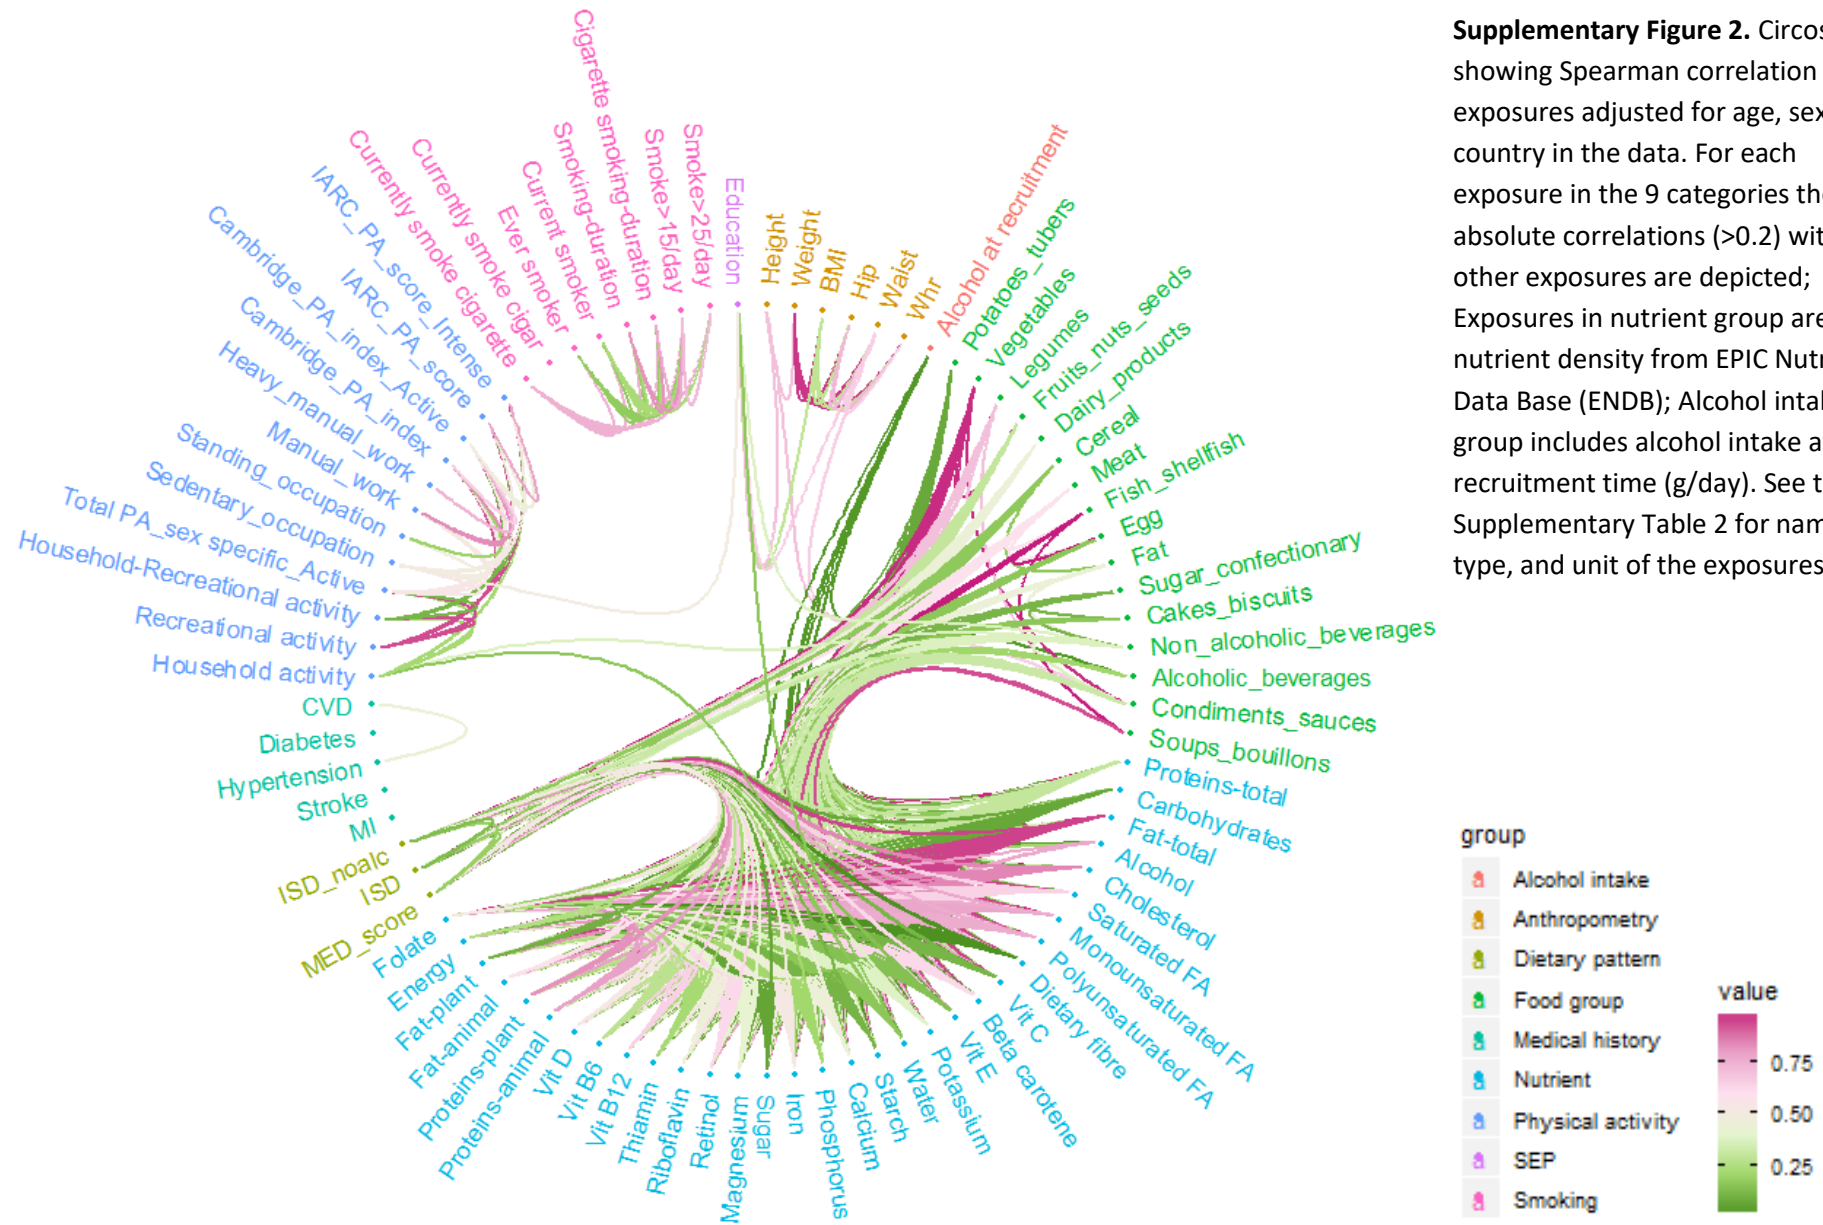

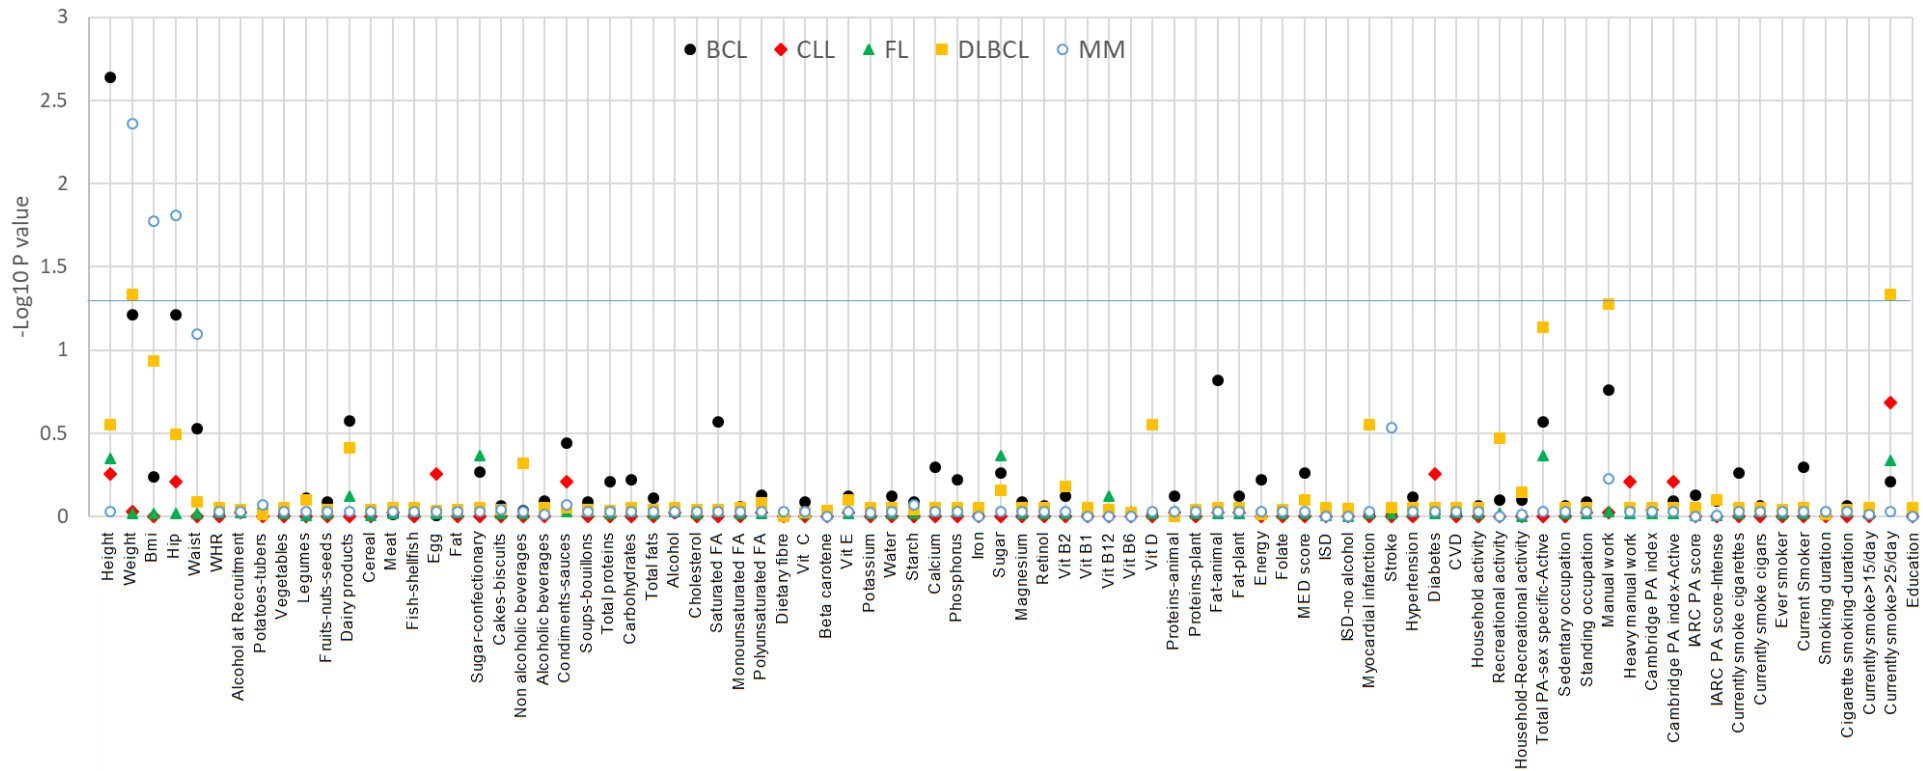

**Supplementary Figure 3.** Cox regression for individual exposure adjusted for age and sex in total BCL and subtypes obtained from meta-analysis of the country-based estimates. Vertical axis shows the  $-\text{Log}_{10}$  pFDR and blue line shows pFDR=0.05
